# Supplementary material for: Prostaglandin E2 (PGE2) and Roflumilast Involvement in IPF Progression
Source: MDPI journal article supplement (doi:10.3390/ijms241512393), 2023-08-03
Supplement: s1 [file s1]

Supplementary Table S1: Antibodies used in the study

| Target                            | Cat. No | Source     | Dilution    | Company                     |
|-----------------------------------|---------|------------|-------------|-----------------------------|
| HIF1 $\alpha$                     | Ab2185  | Rabbit     | 1:1000 (WB) | Abcam                       |
| SMA                               | #19245  | Rabbit     | 1:1000 (WB) | Cell Signaling Technologies |
| PAI-1                             | Ab66705 | Rabbit     | 1:2000 (WB) | Abcam                       |
| Beta-Actin                        | #8457   | Rabbit mAb | 1:1000 (WB) | Cell Signaling Technologies |
| Peroxidase conjugated anti-mouse  | #AP308P | Goat       | 1:5000 (WB) | Millipore                   |
| Peroxidase conjugated anti-Rabbit | #AP132P | Goat       | 1:5000 (WB) | Millipore                   |
